# Supplementary material for: Association of metformin, sulfonylurea and insulin use with brain structure and function and risk of dementia and Alzheimer’s disease: Pooled analysis from 5 cohorts
Source: PubMed Central journal article supplement (PMC6377188; doi:10.1371/journal.pone.0212293), 2019-02-15
Supplement: pone.0212293.s001.pdf [file pone.0212293.s001.pdf]

**S1 Table. Diabetes definition by cohort**

| <b>Cohort</b> | <b>definition</b>                                                                                                                                                      |
|---------------|------------------------------------------------------------------------------------------------------------------------------------------------------------------------|
| <b>FHS</b>    | Random blood glucose $\geq$ 200 mg/dL or fasting blood glucose $\geq$ 126 or on diabetes medication                                                                    |
| <b>SALSA</b>  | self-report of a physician's diagnosis, fasting blood glucose $\geq$ 126, or on diabetes medication                                                                    |
| <b>ARIC</b>   | self-report of a physician diagnosis or glucose lowering medication use                                                                                                |
| <b>RS</b>     | General practitioners' records (including laboratory glucose measurements), hospital discharge letters, and serum glucose measurements from the Rotterdam Study visits |
| <b>AGES</b>   | Self-report of a physician's diagnosis, use of diabetes medication, or fasting glucose $\geq$ 7mmol/l                                                                  |
| <b>IDCD</b>   | Self-report of a physician's diagnosis, use of diabetes medication, fasting glucose $>$ 125 or HbA1c $\geq$ 6.5                                                        |
