# Supplementary material for: Association of metformin, sulfonylurea and insulin use with brain structure and function and risk of dementia and Alzheimer’s disease: Pooled analysis from 5 cohorts
Source: PubMed Central journal article supplement (PMC6377188; doi:10.1371/journal.pone.0212293), 2019-02-15
Supplement: pone.0212293.s002.pdf [file pone.0212293.s002.pdf]

## S2. Distribution of medications

S2a Table: Cohort-specific sample distribution by diabetes treatment

|                             | FHS        | AGES       | SALSA      | ARIC                              |                                      | RS         | ICDC     |
|-----------------------------|------------|------------|------------|-----------------------------------|--------------------------------------|------------|----------|
| <b>Treatment</b>            | N=322      | N=694      | N=586      | N=1,197<br>(Prospective analysis) | N=1732<br>(cross-sectional analysis) | N=451      | N=912    |
| Life-style change *, n (%)  | 130 (40.4) | 346 (49.9) | 212 (36.2) | 141 (11.2)                        | 670 (38.3)                           | 312 (50.8) | 149 (17) |
| Insulin (Ins)               | 33 (10.3)  | 37 (5.3)   | 95 (16.2)  | 387 (32.3)                        | 276 (15.7)                           | 78 (12.7)  | 79 (9)   |
| Sulfonylurea (SU)           | 104 (32.3) | 204 (29.4) | 271 (46.3) | 580 (48.5)                        | 418 (23.8)                           | 126 (20.5) | 289 (33) |
| Metformin (Met)             | 123 (38.2) | 226 (32.6) | 135 (23.0) | 183 (15.3)                        | 691 (39.3)                           | 160 (26.1) | 702 (80) |
| Thiazolidinedione (TZD)     | 48 (14.9)  | 38 (5.5)   | 16 (2.7)   | 51 (4.3)                          | 76 (4.3)                             | 13 (2.1)   | 83 (9)   |
| d-Phenylalanine derivative  | 1 (0.3)    | 0 (0)      | 0 (0)      | 0 (0)                             | 0 (0)                                | NA         | 0 (0)    |
| Meglitinide                 | 0 (0)      | 8 (1.2)    | 0 (0)      | 0 (0)                             | 3 (0.2)                              | NA         | 158 (18) |
| Alpha-glucosidase inhibitor | 1 (0.3)    | 1 (0.1)    | 3 (0.5)    | 17 (1.4)                          | 2 (0.1)                              | NA         | 103 (12) |
| DPP-4 enzyme inhibitor      | 0 (0)      | 0 (0)      | 0 (0)      | 0 (0)                             | 109 (6.2)                            | NA         | 192 (22) |
| Other medications           | 5 (1.6)    | 0 (0)      | 7 (1.2)    | 0 (0)                             | 4 (0.2)                              | 50 (8.1)   | 178 (20) |

Numbers are N (%)

\*Life-style change is percentage of subjects with diabetes but not on diabetic medication

Number of total sample is based on samples assessed for cognitive function; Each medication could be used solely or in combination with other drugs

**S2b Table: Cohort-specific sample distribution by number of medications**

|                      | Combinations | FHS       | AGES       | SALSA      | ARIC       | RS        | ICDC     |
|----------------------|--------------|-----------|------------|------------|------------|-----------|----------|
| Single drug          | Total        | 95 (29.5) | 203        | 236 (40.3) | 842        | 312       |          |
|                      | Ins          | 17 (17.9) | 12 (1.7)   | 42 (7.2)   | 188 (22.2) | 44 (22.7) | 8 (0.9)  |
|                      | SU           | 32 (33.7) | 84 (12.1)  | 150 (25.6) | 179 (21.2) | 52 (26.8) | 6 (0.7)  |
|                      | Met          | 37 (39.0) | 107 (15.4) | 38 (6.5)   | 427 (50.7) | 61 (31.4) | 276 (31) |
|                      | TZD          | 9 (9.5)   | N/A        | 2 (0.3)    | 15 (1.8)   | 0 (0)     | 0 (0)    |
|                      | Other        | 0 (0)     | 6 (0.9)    | 4 (0.7)    | 33 (3.9)   | 37 (19.1) | 4        |
| 2 drugs combinations | Total        | 71 (22.0) | 116 (16.7) | 124 (21.2) | 381        | 92        | 229 (26) |
|                      | Ins/Met      | 6 (8.5)   | 5 (0.7)    | 10 (1.7)   | 77 (20.2)  | 23 (25.0) | 20 (9)   |
|                      | Ins/SU       | 2 (2.8)   | 7 (1.0)    | 27 (4.6)   | 34 (8.9)   | 7 (7.6)   | 2 (1)    |
|                      | Ins/TZD      | 1 (1.4)   | N/A        | 4 (0.7)    | 2 (0.5)    | 0 (0)     | 0 (0)    |
|                      | Ins/other    | 0 (0)     | 1 (0.1)    | 1 (0.2)    | 0 (0)      | 0 (0)     | 9        |
|                      | Met/SU       | 40 (56.3) | 78 (11.2)  | 75 (12.8)  | 181 (47.5) | 61 (66.3) | 55 (24)  |
|                      | Met/TZD      | 12 (16.9) | N/A        | 1 (0.2)    | 20 (5.2)   | 0 (0)     | 1 (1)    |
|                      | Met/other    | 3 (4.2)   | 13 (1.9)   | 0          | 0 (0)      | 0 (0)     | 85       |
|                      | SU/TZD       | 7 (9.9)   | N/A        | 5 (0.9)    | 10 (2.6)   | 0 (0)     | 0 (0)    |

|                       |                                |           |          |          |           |           |        |
|-----------------------|--------------------------------|-----------|----------|----------|-----------|-----------|--------|
|                       | SU/other                       | 0 (0)     | 12(1.7)  | 1 (0.2)  | 0 (0)     | 0 (0)     | 20     |
|                       | TZD/other                      | 0 (0)     | 0 (0)    | 0 (0)    | 0 (0)     | 1 (1.1)   | 0 (0)  |
| 3-drugs combinations  | Total                          | 26 (8.1)  | 23 (3.3) | 13 (2.2) | 92        | 15        | 75 (9) |
|                       | Ins/SU/Met                     | 5 (19.2)  | 12 (1.7) | 7 (1.2)  | 23 (25)   | 4 (26.6)  | 6 (8)  |
|                       | Ins/Met/TZD                    | 1 (3.9)   | 0 (0)    | 0 (0)    | 4 (4.3)   | 0 (0)     | 0 (0)  |
|                       | Ins/SU/TZD                     | 0 (0)     | 0 (0)    | 1 (0.2)  | 0 (0)     | 0 (0)     | 0 (0)  |
|                       | SU/Met/TZD                     | 16 (61.5) | 0 (0)    | 2 (0.3)  | 14 (15.2) | 0 (0)     | 1 (1)  |
|                       | Other                          | 4 (15.4)  | 11(1.6)  | 3 (0.5)  | 51 (55.4) | 11 (73.3) | 65     |
| 4- drugs combinations | Total                          | 0 (0)     | 0 (0)    | 1 (0.2)  | 8         | 1         | 16 (2) |
|                       | Ins/Met/SU/TZD                 | 0 (0)     | 0 (0)    | 0 (0)    | 1 (12.5)  | 1         | 0 (0)  |
| ≥5-drugs combination  | [any:<br>Ins/Met/SU/TZD/other] | 0 (0)     | 0 (0)    | 0 (0)    | 0 (0)     | 0 (0)     | 0 (0)  |

Numbers are N (%)
