# Supplementary material for: Association of metformin, sulfonylurea and insulin use with brain structure and function and risk of dementia and Alzheimer’s disease: Pooled analysis from 5 cohorts
Source: PubMed Central journal article supplement (PMC6377188; doi:10.1371/journal.pone.0212293), 2019-02-15
Supplement: pone.0212293.s004.pdf [file pone.0212293.s004.pdf]

## S4. Descriptives

**S4a Table: Baseline characteristics of FHS study participants by history of diabetes: prospective analyses of incident dementia/AD**

|                                             | Diabetes (history) |                   | Total             |
|---------------------------------------------|--------------------|-------------------|-------------------|
|                                             | Yes                | No                |                   |
| N                                           | 277                | 1337              | 1614              |
| Incident Dementia, n (%)                    | 38 (13.72)         | 95 (7.11)         | 133 (8.24)        |
| Incident Alzheimer's Disease, n (%)         | 30 (10.83)         | 70 (5.24)         | 100 (6.20)        |
| Incident Dementia (10 yr), n (%)            | 35 (12.64)         | 81 (6.06)         | 116 (7.19)        |
| Incident Alzheimer's Disease (10 yr), n (%) | 27 (9.75)          | 60 (4.49)         | 87 (5.39)         |
| Age (mean±SD)                               | 70.08 ± 5.86       | 68.47 ± 5.64      | 68.75 ± 5.71      |
| Women, n (%)                                | 123 (44.40)        | 727 (54.38)       | 850 (52.66)       |
| ApoEε4, n (%)                               | 63 (23.16)         | 294 (22.29)       | 357 (22.44)       |
| Duration with DM (mean±SD)                  | N/A                | N/A               | N/A               |
| Blood glucose in fasting state (mean±SD)    | 150.57 ± 44.06     | 98.15 ± 9.66      | 106.79 ± 27.85    |
| Blood glucose in random state (mean±SD)     | N/A                | N/A               | N/A               |
| HbA1C (mean±SD)                             | 7.21 ± 1.48        | 5.52 ± 0.58       | 5.80 ± 1.02       |
| (median, (Q1, Q3))                          | 6.93 (6.16, 7.78)  | 5.48 (5.18, 5.82) | 5.59 (5.24, 6.05) |
| Systolic blood pressure (mean±SD)           | 136.63 ± 19.64     | 131.43 ± 18.89    | 132.32 ± 19.11    |
| Total Cholesterol (mean±SD)                 | 187.19 ± 40.40     | 201.35 ± 35.32    | 199.02 ± 36.57    |
| HDL (mean±SD)                               | 45.88 ± 13.99      | 54.55 ± 17.14     | 53.13 ± 16.97     |
| HTN (stage≥1) (JNC7 guideline), n (%)       | 214 (77.26)        | 726 (54.34)       | 940 (58.28)       |
| HTN (stage≥1) (JNCI8 guideline), n (%)      | N/A                | N/A               | N/A               |
| Prevalent CVD, n (%)*                       | 76 (27.44)         | 156 (11.67)       | 232 (14.37)       |
| Prevalent stroke, n (%) **                  | 20 (7.22)          | 23 (1.72)         | 43 (2.66)         |
| Current smokers, n (%)                      | 19 (6.86)          | 115 (8.61)        | 134 (8.31)        |
| Education, n (%)                            |                    |                   |                   |
| No HS degree                                | 35 (13.21)         | 66 (5.07)         | 101 (6.45)        |
| HS degree                                   | 95 (35.85)         | 440 (33.79)       | 535 (34.14)       |
| Some college                                | 71 (26.79)         | 381 (29.26)       | 452 (28.84)       |
| College degree                              | 64 (24.15)         | 415 (31.87)       | 479 (30.57)       |

|                                                         |                                         |                                         |                                         |
|---------------------------------------------------------|-----------------------------------------|-----------------------------------------|-----------------------------------------|
| BMI (mean±SD)<br>(median, (Q1, Q3))                     | 30.28 ± 5.35<br>29.59<br>(26.57, 33.55) | 27.66 ± 4.70<br>27.08<br>(24.45, 30.19) | 28.10 ± 4.91<br>27.45<br>(24.69, 30.86) |
| Physical activity index (mean±SD)<br>(median, (Q1, Q3)) | 37.66 ± 6.26<br>36.80<br>(33.20, 41.70) | 38.28 ± 6.52<br>37.40<br>(33.70, 41.80) | 38.18 ± 6.48<br>37.20<br>(33.60, 41.80) |

**S4b Table: Baseline characteristics of FHS study participants: longitudinal analyses of change in cognition (including prevalent dementia)**

|                                          |                     |
|------------------------------------------|---------------------|
| N                                        | 194                 |
| Baseline visit (years)                   | 1998-2001           |
| Duration of follow-up, years (mean±SD)   | 6.48±1.27           |
| Age (mean±SD)                            | 63.75±8.62          |
| Women, n (%)                             | 80 (41.24)          |
| ApoEε4, n (%)                            | 43 (22.75)          |
| Duration with DM (mean±SD)               | --                  |
| Blood glucose in fasting state (mean±SD) | --                  |
| Blood glucose in random state (mean±SD)  | --                  |
| HbA1C (mean±SD)                          | 7.23±1.74           |
| (median, (Q1, Q3))                       | 6.82 (6.07,7.90)    |
| Systolic blood pressure (mean±SD)        | 131.21±16.89        |
| Total Cholesterol (mean±SD)              | 192.28±38.50        |
| HDL (mean±SD)                            | 44.38±13.89         |
| HTN (stage≥1) (JNC7 guideline), n (%)    | 133 (68.56)         |
| HTN (stage≥1) (JNCI8 guideline), n (%)   | --                  |
| Prevalent CVD, n (%)*                    | 49 (25.26)          |
| Prevalent stroke, n (%) **               | 8 (4.12)            |
| Current smokers, n (%)                   | 19 (9.79)           |
| Education, n (%)                         |                     |
| No HS degree                             | 12 (6.19)           |
| HS degree                                | 63 (32.47)          |
| Some college                             | 64 (32.99)          |
| College degree                           | 55 (28.35)          |
| BMI (mean±SD)                            | 30.99±5.82          |
| (median, (Q1, Q3))                       | 29.91 (26.89,34.41) |
| Physical activity index (mean±SD)        | 37.42±6.08          |
| (median, (Q1, Q3))                       | 36.80 (33.20,40.60) |
| Prevalent Dementia, n (%)                | 18 (9.28)           |

**S4c Table: Baseline characteristics of FHS study participants by history of diabetes: cross-sectional analyses**

|                                          | Cognitive data exists               |                                     |                                     | MRI data exists                     |                                     |                                     |
|------------------------------------------|-------------------------------------|-------------------------------------|-------------------------------------|-------------------------------------|-------------------------------------|-------------------------------------|
|                                          | Diabetes (history)                  |                                     | Total                               | Diabetes (history)                  |                                     | Total                               |
|                                          | Yes                                 | No                                  |                                     | Yes                                 | No                                  |                                     |
| N                                        | 322                                 | 1699                                | 2021                                | 234                                 | 1399                                | 1633                                |
| Age (mean±SD)                            | 70.18 ± 8.78                        | 66.55 ± 8.96                        | 67.12 ± 9.03                        | 69.40 ± 8.44                        | 66.03 ± 8.86                        | 66.51 ± 8.88                        |
| Women, n (%)                             | 127 (39.44)                         | 959 (56.44)                         | 1086 (53.74)                        | 86 (36.75)                          | 786 (56.18)                         | 872 (53.40)                         |
| ApoEε4, n (%)                            | 78 (24.92)                          | 370 (22.17)                         | 448 (22.60)                         | 49 (21.59)                          | 312 (22.71)                         | 361 (22.55)                         |
| Duration with DM (mean±SD)               | N/A                                 | N/A                                 | N/A                                 | N/A                                 | N/A                                 | N/A                                 |
| Blood glucose in fasting state (mean±SD) | 140.35 ± 42.29                      | 100.06 ± 9.10                       | 106.46 ± 23.87                      | 140.91 ± 41.81                      | 99.91 ± 9.07                        | 105.80 ± 22.97                      |
| Blood glucose in random state (mean±SD)  | N/A                                 | N/A                                 | N/A                                 | N/A                                 | N/A                                 | N/A                                 |
| HbA1C (mean±SD) (median, (Q1, Q3))       | 6.66 ± 1.15<br>6.40<br>(5.90, 7.00) | 5.55 ± 0.29<br>5.50<br>(5.40, 5.70) | 5.73 ± 0.66<br>5.60<br>(5.40, 5.80) | 6.63 ± 1.10<br>6.40<br>(5.90, 7.00) | 5.55 ± 0.28<br>5.50<br>(5.40, 5.70) | 5.71 ± 0.62<br>5.60<br>(5.40, 5.80) |
| Systolic blood pressure (mean±SD)        | 132.48 ± 17.85                      | 127.61 ± 16.79                      | 128.38 ± 17.06                      | 132.98 ± 18.80                      | 127.00 ± 16.55                      | 127.85 ± 17.01                      |
| Total Cholesterol (mean±SD)              | 164.79 ± 35.66                      | 189.73 ± 36.05                      | 185.81 ± 37.11                      | 164.77 ± 34.70                      | 190.55 ± 35.63                      | 186.89 ± 36.61                      |
| HDL (mean±SD)                            | 47.85 ± 15.23                       | 58.76 ± 17.67                       | 57.05 ± 17.76                       | 48.35 ± 14.90                       | 59.09 ± 17.76                       | 57.56 ± 17.78                       |
| HTN (stage≥1) (JNC7 guideline), n (%)    | 286 (88.82)                         | 961 (56.56)                         | 1247 (61.70)                        | 205 (87.61)                         | 752 (53.75)                         | 957 (58.60)                         |
| HTN (stage≥1) (JNCI8 guideline), n (%)   | N/A                                 | N/A                                 | N/A                                 | N/A                                 | N/A                                 | N/A                                 |
| Prevalent CVD, n (%)*                    | 73 (22.67)                          | 155 (9.12)                          | 228 (11.28)                         | 48 (20.51)                          | 107 (7.65)                          | 155 (9.49)                          |

|                                   |                         |                        |                        |                        |                         |                        |
|-----------------------------------|-------------------------|------------------------|------------------------|------------------------|-------------------------|------------------------|
| Prevalent stroke, n (%) **        | 26 (8.07)               | 33 (1.94)              | 59 (2.92)              | 13 (5.56)              | 26 (1.86)               | 39 (2.39)              |
| Dementia, n (%)                   | 17 (5.28)               | 25 (1.47)              | 42 (2.08)              | 6 (2.56)               | 16 (1.14)               | 22 (1.35)              |
| Current smokers, n (%)            | 20 (6.21)               | 140 (8.24)             | 160 (7.92)             | 15 (6.41)              | 112 (8.01)              | 127 (7.78)             |
| Education, n (%)                  |                         |                        |                        |                        |                         |                        |
| No HS degree                      | 16 (4.97)               | 44 (2.59)              | 60 (2.97)              | 10 (4.27)              | 30 (2.14)               | 40 (2.45)              |
| HS degree                         | 112 (34.78)             | 419 (24.66)            | 531 (26.27)            | 85 (36.32)             | 336 (24.02)             | 421 (25.78)            |
| Some college                      | 100 (31.06)             | 520 (30.61)            | 620 (30.68)            | 62 (26.50)             | 423 (30.24)             | 485 (29.70)            |
| College degree                    | 94 (29.19)              | 716 (42.14)            | 810 (40.08)            | 77 (32.91)             | 610 (43.60)             | 687 (42.07)            |
| BMI (mean±SD)                     | 31.15 ± 5.85            | 27.67 ± 4.99           | 28.22 ± 5.29           | 30.62 ± 5.44           | 27.53 ± 4.89            | 27.97 ± 5.09           |
| (median, (Q1, Q3))                | 30.33<br>(27.17, 34.58) | 27.08<br>(24.21,30.43) | 27.69<br>(24.53,31.14) | 29.89<br>(26.83,34.24) | 26.95<br>(24.13, 30.21) | 27.41<br>(24.40,30.67) |
| Physical activity index (mean±SD) | 33.50 ± 4.53            | 35.35 ± 5.70           | 35.06 ± 5.57           | 33.76 ± 4.23           | 35.54 ± 5.84            | 35.29 ± 5.67           |
| (median, (Q1, Q3))                | 33.10<br>(30.60,36.20)  | 34.60<br>(31.60,38.00) | 34.30<br>(31.50,37.60) | 33.50<br>(31.00,36.30) | 34.80<br>(31.80, 36.30) | 34.50<br>(31.60,38.00) |

**S4d Table: Baseline characteristics of AGES study participants by diabetes status: prospective analyses**

|                                                                        | Diabetes                     |              | Total                           |
|------------------------------------------------------------------------|------------------------------|--------------|---------------------------------|
|                                                                        | Yes                          | No           |                                 |
| N                                                                      | 623                          | 4,494        | 5,117                           |
| Age (mean±SD)                                                          | 76.4±5.3                     | 76.3±5.5     | 76.3±5.5                        |
| N (%) women                                                            | 285(45.8%)                   | 2,669(59.4%) | 2,954(57.7%)                    |
| N (%) with ApoEε4                                                      | 154(25.0%)                   | 1,248(27.8%) | 1,402(27.5%)                    |
| Duration with DM (mean±SD)<br>(median(Q1-Q3)); yrs                     | 12.5±11.6<br>9.5 (3.0-19.0)  | N/A          | <i>Available on a subsample</i> |
| Blood glucose in fasting state<br>(mean±SD); (median(Q1-Q3);<br>mmol/L | 7.85±2.15<br>7.4 (6.6-8.5)   | 5.50±0.51    | 5.78±1.17<br>5.5 (5.2-6.0)      |
| Blood glucose in random state<br>(mean±SD)                             | N/A                          | N/A          | N/A                             |
| HbA1C (mean±SD) %                                                      | 6.44±0.89<br>6.2 (5.90-6.70) | 5.59±0.33    | 5.69±0.52<br>5.60 (5.40-5.90)   |
| Systolic blood pressure<br>(mean±SD), mmHg                             | 145.7±20.8                   | 141.9±20.3   | 142.3±20.4                      |
| Total Chol (mean±SD), mmol/L                                           | 5.16±1.15                    | 5.70±1.15    | 5.63±1.17                       |
| HDL (mean±SD), mmol/L                                                  | 1.38±0.39                    | 1.62±0.45    | 1.59±0.45                       |
| N (%) with HTN (stage≥1)                                               | 566(90.9%)                   | 3,555(79.1%) | 4,121(80.5%)                    |
| N (%) with prevalent CVD                                               | 191(30.9%)                   | 931(20.9%)   | 1,122(22.1%)                    |
| N (%) with prevalent stroke                                            | 51(8.2%)                     | 203(4.6%)    | 254(5.0%)                       |
| N (%) current smokers                                                  | 74(12.0%)                    | 546(12.3%)   | 620 (12.2%)                     |
| Years of education (mean±SD)<br><b><u>Education categories</u></b>     |                              |              |                                 |
| Primary education                                                      | 118(20.2%)                   | 994(22.7%)   | 1,112(22.4%)                    |
| Secondary                                                              | 297(50.9%)                   | 2190(50.0%)  | 2,487(50.1%)                    |
| College                                                                | 87(14.9%)                    | 700(16.0%)   | 787(15.9%)                      |
| University                                                             | 82(14.0%)                    | 498(11.4%)   | 580(11.7%)                      |
| BMI (mean±SD), kg/m <sup>2</sup>                                       | 28.91±4.80                   | 26.84±4.32   | 27.10±4.43                      |

|                                                 |            |              |               |
|-------------------------------------------------|------------|--------------|---------------|
| Physical activity index<br>(mean±SD)            |            |              |               |
| <b><u>Physical activity in current life</u></b> |            |              |               |
| Never/rarely/occasionally                       | 421(72.7%) | 2,961(68.0%) | 3,382 (68.5%) |
| Moderate/high                                   | 158(27.3%) | 1,394(32.0%) | 1,552(31.5%)  |

**S4e Table: Baseline characteristics of AGES study participants: longitudinal analyses of change in cognition**

|                                                                                                        |                             |
|--------------------------------------------------------------------------------------------------------|-----------------------------|
|                                                                                                        |                             |
| N                                                                                                      | 287                         |
| Baseline visit (years)                                                                                 | 2002-2006                   |
| Duration of follow-up(mean±SD)                                                                         | 5.1±0.2                     |
| Age (mean±SD)                                                                                          | 74.5±4.3                    |
| Women, n (%)                                                                                           | 134(46.7%)                  |
| ApoEε4, n (%)                                                                                          | 78(27.4%)                   |
| Duration with DM (mean±SD)                                                                             | -                           |
| Blood glucose in fasting state (mean±SD)mmol/L                                                         | 7.8±2.0                     |
| Blood glucose in random state (mean±SD)                                                                | -                           |
| HbA1C (mean±SD)<br>(median, (Q1, Q3))                                                                  | -                           |
| Systolic blood pressure (mean±SD)                                                                      | 145.4±20.1                  |
| Total Cholesterol (mean±SD)                                                                            | 5.1±1.2                     |
| HDL (mean±SD)                                                                                          | -                           |
| HTN (stage≥1) (JNC7 guideline), n (%)                                                                  | 258(89.9%)                  |
| HTN (stage≥1) (JNC18 guideline), n (%)                                                                 | -                           |
| Prevalent CVD, n (%)*                                                                                  | 79(27.7%)                   |
| Prevalent stroke, n (%) **                                                                             | 13(4.5%)                    |
| Current smokers, n (%)                                                                                 | 27(9.4%)                    |
| Education, n (%)                                                                                       |                             |
|                                                                                                        | No HS degree 48(16.8%)      |
|                                                                                                        | HS degree 155(54.2%)        |
|                                                                                                        | Some college 40(14.0%)      |
|                                                                                                        | College degree 43(15.0%)    |
| BMI (mean±SD)<br>(median, (Q1, Q3))                                                                    | 29.3±4.6<br>28.9(26.2-32.1) |
| Physical activity index (mean±SD)<br>(median, (Q1, Q3)) present moderate/high physical activity, n (%) | 94(33.1%)                   |



|                           |          |
|---------------------------|----------|
| Prevalent Dementia, n (%) | 6 (2.1%) |
|---------------------------|----------|

**S4f Table: Baseline characteristics of AGES study participants by diabetes status: cross-sectional analyses**

|                                                 | Cognitive data exists                   |              |                           | MRI data exists |     |       |
|-------------------------------------------------|-----------------------------------------|--------------|---------------------------|-----------------|-----|-------|
|                                                 | Diabetes                                |              | Total                     | Diabetes        |     | Total |
|                                                 | Yes                                     | No           |                           | Yes             | No  |       |
| N                                               | 694                                     | 4,816        | 5,510                     | N/A             | N/A | N/A   |
| Age (mean±SD), yrs                              | 77.0±5.6                                | 76.7±5.7     | 76.7±5.7                  | N/A             | N/A | N/A   |
| N (%) women                                     | 312(45.0%)                              | 2,854(59.3%) | 3,166(57.5%)              | N/A             | N/A | N/A   |
| N (%) with ApoEε4                               | 173(25.2%)                              | 1384(28.8%)  | 1,557(28.4%)              | N/A             | N/A | N/A   |
| Duration with DM (mean±SD), yrs                 | 12.4±11.5<br>9.0(3.0-19.0) <sup>a</sup> | -            | Available on a subsample  | N/A             | N/A | N/A   |
| Blood glucose in fasting state (mean±SD) mmol/L | 7.82±2.12<br>7.4(6.6-8.4)               | 5.50±0.51    | 5.79±1.18<br>5.5(5.2-6.0) | N/A             | N/A | N/A   |
| Blood glucose in random state (mean±SD)         | N/A                                     | N/A          | N/A                       | N/A             | N/A | N/A   |
| HbA1C (mean±SD), %                              | 6.44±0.90<br>6.2(5.9-6.8)               | 5.59±0.33    | 5.69±0.52<br>5.6(5.4-5.9) | N/A             | N/A | N/A   |
| Systolic blood pressure (mean±SD)               | 144.9±21.0                              | 141.9±20.5   | 142.2±20.5                | N/A             | N/A | N/A   |
| Total Chol (mean±SD),mmol/L                     | 5.19±1.16                               | 5.70±1.15    | 5.63±1.16                 | N/A             | N/A | N/A   |
| HDL (mean±SD),mmol/L                            | 1.38±0.39                               | 1.62±0.45    | 1.59±0.45                 | N/A             | N/A | N/A   |
| N (%) with HTN (stage≥1)                        | 628(90.5%)                              | 3820(79.3%)  | 4,448(80.7%)              | N/A             | N/A | N/A   |
| N (%) with prevalent CVD                        | 221(32.1%)                              | 1017(21.3%)  | 1,238(22.7%)              | N/A             | N/A | N/A   |
| N (%) with prevalent stroke                     | 62(9%)                                  | 241(5.1%)    | 303(5.6%)                 | N/A             | N/A | N/A   |
| N (%) with dementia                             | N/A                                     | N/A          | N/A                       | N/A             | N/A | N/A   |
| N (%) current smokers                           | 80(11.7%)                               | 586(12.3%)   | 666(12.2%)                | N/A             | N/A | N/A   |

|                                          |            |             |             |     |     |     |
|------------------------------------------|------------|-------------|-------------|-----|-----|-----|
| <b>Education categories</b>              |            |             |             | N/A | N/A | N/A |
| Primary education                        | 133(21.2%) | 1113(23.9%) | 1246(23.6%) |     |     |     |
| Secondary                                | 322(51.3%) | 2310(49.6%) | 2632(49.8%) |     |     |     |
| College                                  | 90(14.3%)  | 721(15.5%)  | 811(15.4%)  |     |     |     |
| University                               | 83(13.2%)  | 512(11.0%)  | 595(11.3%)  |     |     |     |
| BMI (mean±SD), kg/m <sup>2</sup>         | 28.85±4.79 | 26.78±4.32  | 27.04±4.43  | N/A | N/A | N/A |
| Physical activity index<br>(mean±SD)     |            |             |             | N/A | N/A | N/A |
| <b>Physical activity in current life</b> |            |             |             |     |     |     |
| Never/rarely/occasionally                | 460(73.8%) | 3190(68.9%) | 3650(69.5%) |     |     |     |
| Moderate/high                            | 163(26.2%) | 1440(31.1%) | 1603(30.5%) |     |     |     |

<sup>a</sup> Median(Q1-Q3) was also presented for continuous data with skewed distribution

**S4g Table: Baseline characteristics of SALSA study participants by diabetes status: prospective analyses**

|                                          | Diabetes   |            | Total       |
|------------------------------------------|------------|------------|-------------|
|                                          | Yes        | No         |             |
| N                                        | 555        | 1156       | 1711        |
| Age (mean±SD)                            | 69.9±6.6   | 70.5±7.0   | 70.3±6.8    |
| N (%) women                              | 313 (56.4) | 687 (59.4) | 1003 (58.3) |
| N (%) with ApoEε4                        | 56 (11.1)  | 158 (15.1) | 215 (13.8)  |
| Duration with DM (mean±SD)               | 12.9±11.3  | -          | 12.9±11.3   |
| Blood glucose in fasting state (mean±SD) | 157.8±58.3 | 93.8±12.0  | 115.0±46.1  |
| Blood glucose in random state (mean±SD)  | -          | -          | -           |
| HbA1C (mean±SD)                          | -          | -          | -           |
| Systolic blood pressure (mean±SD)        | 140.4±19.7 | 137.4±19.0 | 138.4±19.3  |
| Total Chol (mean±SD)                     | 208.1±42.8 | 214.6±38.1 | 212.5±39.8  |
| HDL (mean±SD)                            | 48.2±11.8  | 53.6±14.0  | 51.8±13.5   |
| N (%) with HTN (stage≥1)                 | 415 (74.8) | 635 (54.9) | 1050 (61.1) |
| N (%) with prevalent CVD                 | 269 (48.5) | 352 (30.5) | 621 (36.3)  |
| N (%) with prevalent stroke              | 71 (12.8)  | 74 (6.4)   | 145 (8.5)   |
| N (%) current smokers                    | 54 (9.7)   | 141 (12.2) | 195 (11.4)  |
| Years of education (mean±SD)             | 7.2±5.4    | 7.3±5.3    | 7.3±5.3     |
| BMI (mean±SD)                            | 31.0±6.0   | 29.1±5.4   | 29.7±5.7    |
| Physical activity index (mean±SD)        | 16.3±5.4   | 17.6±5.4   | 17.2±5.5    |

**S4h Table: Baseline characteristics of SALSA study participants: longitudinal analyses of change in cognition**

|                                          |            |
|------------------------------------------|------------|
| N                                        | 586        |
| Age (mean±SD)                            | 70.3±6.9   |
| N (%) women                              | 332 (56.7) |
| N (%) with ApoEε4                        | 60 (11.2)  |
| Duration with DM (mean±SD)               | 12.8±11.3  |
| Blood glucose in fasting state (mean±SD) | 157.0±58.3 |
| Blood glucose in random state (mean±SD)  | -          |
| HbA1C (mean±SD)                          | -          |
| Systolic blood pressure (mean±SD)        | 140.3±20.0 |
| Total Chol (mean±SD)                     | 207.5±42.7 |
| HDL (mean±SD)                            | 48.3±11.8  |
| N (%) with HTN (stage≥1)                 | 439 (74.9) |
| N (%) with prevalent CVD                 | 288 (49.2) |
| N (%) with prevalent stroke              | 87 (14.9)  |
| N (%) with dementia                      | 31 (5.3)   |
| N (%) current smokers                    | 57 (9.7)   |
| Years of education (mean±SD)             | 7.1±5.4    |
| BMI (mean±SD)                            | 30.9±6.0   |
| Physical activity index (mean±SD)        | 16.3±5.4   |
| Prevalent dementia, n(%)                 | 31 (5.3)   |

**S4i Table: Baseline characteristics of SALSA study participants by diabetes status: cross-sectional analyses**

|                                          | Cognitive data exists |            |             | MRI data exists |            |            |
|------------------------------------------|-----------------------|------------|-------------|-----------------|------------|------------|
|                                          | Diabetes              |            | Total       | Diabetes        |            | Total      |
|                                          | Yes                   | No         |             | Yes             | No         |            |
| N                                        | 586                   | 1192       | 1778        | 85              | 121        | 206        |
| Age (mean±SD)                            | 70.3±6.9              | 70.8±7.2   | 70.7±7.1    | 70.5±6.9        | 71.2±6.5   | 70.9±6.7   |
| N (%) women                              | 332 (56.7)            | 708 (59.4) | 1040 (58.5) | 46 (54.1)       | 69 (57.0)  | 115 (55.8) |
| N (%) with ApoEε4                        | 60 (11.2)             | 164 (15.2) | 224 (13.9)  | 17 (20.0)       | 29 (24.2)  | 46 (22.4)  |
| Duration with DM (mean±SD)               | 12.8±11.3             | -          | 12.8±11.3   | 11.5±13.4       | -          | 11.5±13.4  |
| Blood glucose in fasting state (mean±SD) | 157.0±58.3            | 93.7±12.0  | 115.0±46.2  | 156.0±50.2      | 93.6±10.5  | 119.7±45.4 |
| Blood glucose in random state (mean±SD)  | -                     | -          | -           | -               | -          | -          |
| HbA1C (mean±SD)                          | -                     | -          | -           | -               | -          | -          |
| Systolic blood pressure (mean±SD)        | 140.3±20.0            | 137.4±19.1 | 138.4±19.4  | 140.9±19.8      | 137.7±19.3 | 139.0±19.5 |
| Total Chol (mean±SD)                     | 207.5±42.7            | 214.2±38.4 | 211.9±40.0  | 200.2±36.3      | 213.1±39.4 | 207.7±38.6 |
| HDL (mean±SD)                            | 48.3±11.8             | 53.6±14.0  | 51.8±13.6   | 48.4±12.2       | 54.2±13.6  | 51.8±13.3  |
| N (%) with HTN (stage≥1)                 | 439 (74.9)            | 661 (55.5) | 1100 (61.9) | 64 (75.3)       | 71 (58.7)  | 135 (65.5) |
| N (%) with prevalent CVD                 | 288 (49.2)            | 371 (31.1) | 659 (37.1)  | 36 (42.4)       | 43 (35.5)  | 79 (38.4)  |
| N (%) with prevalent stroke              | 87 (14.9)             | 81 (6.8)   | 168 (9.5)   | 14 (16.5)       | 13 (10.7)  | 27 (13.1)  |
| N (%) with dementia                      | 31 (5.3)              | 37 (3.1)   | 68 (3.8)    | 12 (14.1)       | 10 (8.3)   | 22 (10.7)  |
| N (%) current smokers                    | 57 (9.7)              | 146 (12.3) | 203 (11.4)  | 11 (12.9)       | 10 (8.3)   | 21 (10.2)  |
| Years of education (mean±SD)             | 7.1±5.4               | 7.3±5.3    | 7.2±5.3     | 7.7±5.4         | 8.1±5.6    | 8.0±5.5    |
| BMI (mean±SD)                            | 30.9±6.0              | 29.1±5.4   | 29.7±5.6    | 30.6±4.9        | 29.2±4.9   | 29.8±5.0   |
| Physical activity index (mean±SD)        | 16.3±5.4              | 17.6±5.4   | 17.2±5.5    | 15.6±4.9        | 17.3±5.5   | 16.6±5.3   |

**S4j Table: Baseline characteristics of ARIC study participants by diabetes status: prospective analyses**

|                                          | Diabetes     |              | Total        |
|------------------------------------------|--------------|--------------|--------------|
|                                          | Yes          | No           |              |
| N                                        | 1197         | 9544         | 10741        |
| Age (mean±SD)                            | 64.05±5.75   | 63.25±5.65   | 63.34±5.66   |
| N (%) women                              | 646(53.97)   | 5331(55.86)  | 5977(55.65)  |
| N (%) with ApoE ε4                       | 339(28.32)   | 2798(29.32)  | 3137(29.21)  |
| Duration with DM (mean±SD)               | 5.79±3.48    | -            | -            |
| Blood glucose in fasting state (mean±SD) | 164.12±60.39 | 102.47±19.53 | 108.04±31.44 |
| Blood glucose in random state (mean±SD)  | 209.91±93.03 | 107.19±30.07 | 171.08±90.57 |
| HbA1C (mean±SD)                          | -            | -            | -            |
| Systolic blood pressure (mean±SD)        | 132.73±19.96 | 126.66±18.61 | 127.33±18.86 |
| Total Chol (mean±SD)                     | 196.96±39.58 | 201.36±36.67 | 200.87±37.03 |
| HDL (mean±SD)                            | 44.51±14.05  | 50.57±16.56  | 49.90±16.41  |
| N (%) with HTN (stage≥1)                 | 805(67.25)   | 4229(44.31)  | 5034(46.87)  |
| N (%) with prevalent CVD                 | 219(18.30)   | 692(7.25)    | 911(8.48)    |
| N (%) with prevalent stroke              | 55(4.59)     | 176(1.84)    | 231(2.15)    |
| N (%) current smokers                    | 160(13.37)   | 1399(14.66)  | 1559(14.51)  |
| Years of education (mean±SD)             | 13.46±4.47   | 14.77±4.28   | 14.62±4.32   |
| BMI (mean±SD)                            | 31.73±5.99   | 28.40±5.39   | 28.77±5.56   |
| Physical activity index (mean±SD)        | 2.38±0.76    | 2.57±0.82    | 2.55±0.81    |

**S4k Table: Baseline characteristics of ARIC study participants: longitudinal analyses of change in cognition**

|                                                                                                           |              |
|-----------------------------------------------------------------------------------------------------------|--------------|
| N                                                                                                         | 1,197        |
| Baseline visit (years)                                                                                    | 1996-1998    |
| Duration of follow-up(mean±SD)                                                                            | 11.81±4.63   |
| Age (mean±SD)                                                                                             | 64.05±5.75   |
| Women, n (%)                                                                                              | 646(53.97)   |
| ApoEε4, n (%)                                                                                             | 339(28.32)   |
| Duration with DM (mean±SD)                                                                                | 5.79±3.48    |
| Blood glucose in fasting state<br>(mean±SD)mmol/L                                                         | 164.12±60.39 |
| Blood glucose in random state (mean±SD)                                                                   | 209.91±93.03 |
| HbA1C (mean±SD)<br>(median, (Q1, Q3))                                                                     | -            |
| Systolic blood pressure (mean±SD)                                                                         | 132.73±19.96 |
| Total Cholesterol (mean±SD)                                                                               | 196.96±39.58 |
| HDL (mean±SD)                                                                                             | 44.51±14.05  |
| HTN (stage≥1), n (%)                                                                                      | 805(67.25)   |
| Prevalent CVD, n (%)*                                                                                     | 219(18.30)   |
| Prevalent stroke, n (%) **                                                                                | 55(4.59)     |
| Current smokers, n (%)                                                                                    | 160(13.37)   |
| Education, years                                                                                          | 13.46±4.47   |
| BMI (mean±SD)<br>(median, (Q1, Q3))                                                                       | 31.73±5.99   |
| Physical activity index (mean±SD)<br>(median, (Q1, Q3)) present moderate/high<br>physical activity, n (%) | 2.38±0.76    |
| Prevalent Dementia, n (%)                                                                                 | 0 (0)        |

**S4I Table: Baseline characteristics of ARIC study participants by diabetes status: cross-sectional analyses**

|                                          | Cognitive data exists |              |              | MRI data exists |              |              |
|------------------------------------------|-----------------------|--------------|--------------|-----------------|--------------|--------------|
|                                          | Diabetes              |              | Total        | Diabetes        |              | Total        |
|                                          | Yes                   | No           |              | Yes             | No           |              |
| N                                        | 1732                  | 3724         | 5456         | 575             | 1177         | 1752         |
| Age (mean±SD)                            | 75.77±5.16            | 75.68±5.24   | 75.71±5.21   | 75.76±5.18      | 75.66±5.23   | 75.69±5.21   |
| N (%) women                              | 981(56.64)            | 2195(58.94)  | 3176(58.21)  | 340(59.13)      | 702(59.64)   | 1042(59.47)  |
| N (%) with ApoEε4                        | 498(28.75)            | 1073(28.81)  | 1571(28.79)  | 160(27.83)      | 348(29.57)   | 508(29.00)   |
| Duration with DM (mean±SD)               | 9.92±6.60             | -            | 9.92±6.60    | 9.85±6.55       | -            | 9.85±6.55    |
| Blood glucose in fasting state (mean±SD) | 129.60±38.14          | 104.26±13.90 | 112.08±26.81 | 129.48±38.29    | 104.19±13.76 | 111.95±26.76 |
| Blood glucose in random state (mean±SD)  | 145.77±56.21          | 105.33±16.39 | 120.38±41.30 | 145.77±56.21    | 105.33±16.39 | 120.38±41.30 |
| HbA1C (mean±SD)                          | 6.58±1.10             | 5.64±0.40    | 5.93±0.82    | 6.56±1.09       | 5.64±0.39    | 5.92±0.81    |
| Systolic blood pressure (mean±SD)        | 129.92±17.33          | 129.73±18.00 | 129.79±17.79 | 129.86±17.29    | 129.64±17.96 | 129.71±17.75 |
| Total Chol (mean±SD)                     | 172.03±40.46          | 191.33±42.08 | 185.35±42.52 | 172.21±40.61    | 191.27±42.12 | 185.40±42.57 |
| HDL (mean±SD)                            | 49.40±12.77           | 55.29±14.34  | 53.46±14.14  | 49.43±12.80     | 55.27±14.33  | 53.47±14.14  |
| N (%) with HTN (stage≥1)                 | 1475(85.16)           | 2582(69.33)  | 4057(74.36)  | 485(84.35)      | 834(70.86)   | 1319(75.29)  |
| N (%) with prevalent CVD                 | 328(18.94)            | 463(12.43)   | 791(14.50)   | 63(10.96)       | 100(8.50)    | 163(9.30)    |
| N (%) with prevalent stroke              | 87(5.02)              | 105(2.82)    | 192(3.52)    | 25(4.35)        | 36(3.06)     | 61(3.48)     |
| N (%) with dementia                      | 76(4.40)              | 112(3.01)    | 188(3.45)    | 34(5.91)        | 57(4.84)     | 91(5.19)     |
| N (%) current smokers                    | 96(5.54)              | 219(5.88)    | 315(5.77)    | 25(4.35)        | 63(5.35)     | 88(5.02)     |
| Years of education (mean±SD)             | 14.69±4.13            | 15.92±4.18   | 15.54±4.20   | 14.71±4.13      | 15.91±4.18   | 15.54±4.20   |
| BMI (mean±SD)                            | 30.43±5.71            | 27.52±5.25   | 28.42±5.56   | 30.41±5.74      | 27.52±5.24   | 28.41±5.56   |
| Physical activity index (mean±SD)        | 2.15±0.60             | 2.36±0.63    | 2.30±0.63    | 2.15±0.60       | 2.36±0.64    | 2.30±0.63    |



**S4m Table: Baseline characteristics of RS study participants by diabetes status: prospective analyses**

|                                          | Diabetes     |              | Total        |
|------------------------------------------|--------------|--------------|--------------|
|                                          | Yes          | No           |              |
| N                                        | 608          | 5149         | 5757         |
| Age (mean±SD)                            | 63.6 (7.8)   | 60.9 (8.8)   | 61.2 (8.9)   |
| N (%) women                              | 274 (45.1)   | 2969 (57.7)  | 3243 (56.3)  |
| N (%) with ApoEε4                        | 158 (27.7)   | 1408 (28.6)  | 1566 (28.7)  |
| Duration with DM (mean±SD)               | NA           | -            | NA           |
| Blood glucose in fasting state (mean±SD) | 7.9 (2.4)    | 5.3 (0.6)    | 5.6 (1.2)    |
| Blood glucose in random state (mean±SD)  | NA           | NA           | NA           |
| HbA1C (mean±SD)                          | NA           | NA           | NA           |
| Systolic blood pressure (mean±SD)        | 144.9 (20.9) | 136.5 (20.1) | 137.4 (20.3) |
| Total Chol (mean±SD)                     | 5.1 (1.2)    | 5.6 (1.0)    | 5.6 (1.0)    |
| HDL (mean±SD)                            | 1.2 (0.4)    | 1.4 (0.4)    | 1.4 (0.4)    |
| N (%) with HTN (stage≥1)                 | 391 (64.3)   | 2454 (47.7)  | 2845 (49.5)  |
| N (%) with prevalent CVD                 | 77 (12.7)    | 261 (5.1)    | 338 (5.9)    |
| N (%) with prevalent stroke              | 35 (5.8)     | 133 (2.6)    | 168 (3.0)    |
| N (%) current smokers                    | 139 (22.9)   | 1190 (23.1)  | 1329 (23.1)  |
| Years of education                       |              |              |              |
| Low (%)                                  | 215 (35.4)   | 1473 (28.6)  | 1688 (29.3)  |
| Middle (%)                               | 273 (44.9)   | 2425 (47.1)  | 2698 (46.9)  |
| High (%)                                 | 112 (18.4)   | 1196 (23.2)  | 1308 (22.7)  |
| BMI (mean±SD)                            | 30.5 (5.0)   | 27.4 (4.2)   | 27.7 (4.4)   |
| Physical activity index (mean±SD)        | 55.8 (78.4)  | 59.9 (58.3)  | 59.6 (60.4)  |

**S4n Table: Baseline characteristics of RS study participants: longitudinal analyses of change in cognition**

|                                                         |                              |
|---------------------------------------------------------|------------------------------|
| N                                                       | 250                          |
| Baseline visit (years)                                  | 2004-2008                    |
| Duration of follow-up                                   | 5.8±0.5                      |
| Age (mean±SD)                                           | 60.7±6.8                     |
| Women, n (%)                                            | 103 (41.2)                   |
| ApoEε4, n (%)                                           | 63 (25.2)                    |
| Duration with DM (mean±SD)                              | NA                           |
| Blood glucose in fasting state (mean±SD)                | 8.0±2.8                      |
| Blood glucose in random state (mean±SD)                 | NA                           |
| HbA1C (mean±SD)<br>(median, (Q1, Q3))                   | NA                           |
| Systolic blood pressure (mean±SD)                       | 141.6±19.4                   |
| Total Cholesterol (mean±SD)                             | 5.0±1.2                      |
| HDL (mean±SD)                                           | 1.2±0.3                      |
| HTN (stage≥1) (JNC7 guideline), n (%)                   | 180 (72.0)                   |
| HTN (stage≥1) (JNC18 guideline), n (%)                  | 152 (60.8)                   |
| Prevalent CVD, n (%)*                                   | 30 (12.0)                    |
| Prevalent stroke, n (%) **                              | 7 (2.8)                      |
| Current smokers, n (%)                                  | 63 (25.2)                    |
| Years of education, n (%)                               |                              |
| Low                                                     | 66 (26.4)                    |
| Middle                                                  | 130 (52.0)                   |
| High                                                    | 54 (21.6)                    |
| BMI (mean±SD)<br>(median, (Q1, Q3))                     | 30.8±4.9<br>30.0(27.2-33.2)  |
| Physical activity index (mean±SD)<br>(median, (Q1, Q3)) | 66.6±81.5<br>56.7(21.3-87.9) |
| Prevalent Dementia, n (%)                               | 0 (0)                        |

**S4o Table: Baseline characteristics of RS study participants by diabetes status: cross-sectional analyses**

|                                          | Cognitive data exists |              |              | MRI data exists |              |             |
|------------------------------------------|-----------------------|--------------|--------------|-----------------|--------------|-------------|
|                                          | Diabetes              |              | Total        | Diabetes        |              | Total       |
|                                          | Yes                   | No           |              | Yes             | No           |             |
| N                                        | 451                   | 4293         | 4744         | 349             | 3409         | 3758        |
| Age (mean±SD)                            | 62.5 (8.1)            | 60.3 (8.4)   | 60.5 (8.4)   | 60.9 (7.6)      | 58.7 (7.5)   | 58.9 (7.5)  |
| N (%) women                              | 199 (44.1)            | 2493 (58.1)  | 2692 (56.7)  | 144 (41.3)      | 1890 (55.4)  | 2034 (54.1) |
| N (%) with ApoEε4                        | 119 (28.1)            | 1192 (29.1)  | 1311 (29.0)  | 93 (28.8)       | 954 (29.5)   | 1047 (29.5) |
| Duration with DM (mean±SD)               | NA                    | -            | NA           | NA              | -            | NA          |
| Blood glucose in fasting state (mean±SD) | 7.8 (2.4)             | 5.3 (0.6)    | 5.6 (1.2)    | 7.9 (2.5)       | 5.3 (0.6)    | 5.5 (1.2)   |
| Blood glucose in random state (mean±SD)  | NA                    | NA           | NA           | NA              | NA           | NA          |
| HbA1C (mean±SD)                          | NA                    | NA           | NA           | NA              | NA           | NA          |
| Systolic blood pressure (mean±SD)        | 144.4 (20.3)          | 136.3 (19.9) | 137.1 (20.2) | 141.6 (19.4)    | 134.0 (19.1) | 134.7 (1.2) |
| Total Chol (mean±SD)                     | 5.1 (1.2)             | 5.7 (1.0)    | 5.6 (1.0)    | 5.0 (1.2)       | 5.6 (1.0)    | 5.6 (1.0)   |
| HDL (mean±SD)                            | 1.2 (0.4)             | 1.5 (0.4)    | 1.4 (0.4)    | 1.2 (0.3)       | 1.4 (0.4)    | 1.4 (0.4)   |
| N (%) with HTN (stage≥1)                 | 291 (64.5)            | 2026 (47.2)  | 2317 (48.8)  | 231 (66.2)      | 1548 (45.4)  | 1779 (47.3) |
| N (%) with prevalent CVD                 | 55 (12.2)             | 194 (4.5)    | 249 (5.2)    | 37 (10.6)       | 122 (3.6)    | 159 (4.2)   |
| N (%) with prevalent stroke              | 21 (4.7)              | 82 (1.9)     | 103 (2.2)    | 14 (4.0)        | 76 (2.2)     | 90 (2.4)    |
| N (%) with dementia                      | 0                     | 8 (0.2)      | 8 (0.2)      | 5 (1.4)         | 6 (0.2)      | 11 (0.3)    |
| N (%) current smokers                    | 111 (24.6)            | 968 (22.5)   | 1079 (22.7)  | 97 (27.8)       | 809 (23.7)   | 906 (24.1)  |
| Years of education                       |                       |              |              |                 |              |             |
| Low (%)                                  | 145 (32.2)            | 1176 (27.4)  | 1321 (27.8)  | 113 (32.4)      | 890 (26.1)   | 1003 (26.7) |
| Middle (%)                               | 217 (48.1)            | 2052 (47.8)  | 2269 (47.8)  | 155 (44.4)      | 1609 (47.2)  | 1764 (46.9) |
| High (%)                                 | 81 (18.0)             | 1024 (23.9)  | 1105 (23.3)  | 78 (22.3)       | 879 (25.8)   | 957 (25.5)  |
| BMI (mean±SD)                            | 30.5 (4.9)            | 27.4 (4.2)   | 27.7 (4.4)   | 30.2 (4.7)      | 27.2 (4.0)   | 27.5 (4.2)  |
| Physical activity index (mean±SD)        | 60.0 (57.8)           | 54.2 (80.0)  | 59.7 (60.7)  | 52.3 (52.9)     | 60.6 (59.6)  | 59.9 (59.1) |
| Depression                               | 44 (9.8)              | 375 (8.7)    | 419 (8.8)    | 35 (10.0)       | 279 (8.2)    | 314 (8.4)   |

**S4p Table: Baseline characteristics of IDCD study participants by diabetes status: cross-sectional analyses**

|                                          | Cognitive data exists                  |     |       | MRI data exists                        |     |       |
|------------------------------------------|----------------------------------------|-----|-------|----------------------------------------|-----|-------|
|                                          | Diabetes                               |     | Total | Diabetes                               |     | Total |
|                                          | Yes                                    | No  |       | Yes                                    | No  |       |
| N                                        | 912                                    | N/A | N/A   | 125                                    | N/A | N/A   |
| Age (mean±SD)                            | 72.9±4.7                               | N/A | N/A   | 71.5 (3.8)                             | N/A | N/A   |
| N (%) women                              | 539 (59%)                              | N/A | N/A   | 48 (38%)                               | N/A | N/A   |
| N (%) with ApoEε4                        | 294 Missing<br>88 (14%)                | N/A | N/A   | 28 (22%)                               | N/A | N/A   |
| Duration with DM (mean±SD)               | 8.7 (2.6)                              | N/A | N/A   | 8.6 (2.4)                              | N/A | N/A   |
| Blood glucose in fasting state (mean±SD) | 136.0±21.6                             | N/A | N/A   | 136.5 (21.4)                           | N/A | N/A   |
| Blood glucose in random state (mean±SD)  |                                        | N/A | N/A   |                                        | N/A | N/A   |
| Systolic blood pressure (mean±SD)        | 164.8±9.4                              | N/A | N/A   | 166.4 (10.1)                           | N/A | N/A   |
| Total Chol (mean±SD)                     | 180.6±24.9                             | N/A | N/A   | 179.6 (23.3)                           | N/A | N/A   |
| HDL (mean±SD)                            | 47.7±10.8                              | N/A | N/A   | 47.5 (10.7)                            | N/A | N/A   |
| N (%) with HTN (stage≥1)                 | 785 (86%)                              | N/A | N/A   | 106 (84.8)                             | N/A | N/A   |
| N (%) with HTN (stage≥1)                 | N/A                                    | N/A | N/A   | N/A                                    | N/A | N/A   |
| N (%) with prevalent CVD                 | 218 (25%) with<br>CVD                  | N/A | N/A   | 33 (26)                                | N/A | N/A   |
| N (%) with prevalent stroke              | 0                                      | N/A | N/A   | 0                                      | N/A | N/A   |
| N (%) current smokers                    | 89 (9.9%)                              | N/A | N/A   | 14 (6.4%)                              | N/A | N/A   |
| Years of education (mean±SD)             | 13.1±3.5                               | N/A | N/A   | 13.9 (3.6)                             | N/A | N/A   |
| BMI (mean±SD)                            | 28.6±7.8                               | N/A | N/A   | 28.4 (4.5)                             | N/A | N/A   |
| Physical activity index, n(%)            | High 62.9%<br>Middle 31.2%<br>Low 5.8% | N/A | N/A   | High 62.5%<br>Middle 29.6%<br>Low 7.9% | N/A | N/A   |
| Depression                               | 87 (10%)                               | N/A | N/A   | 14 (6.5%)                              | N/A | N/A   |
