# Supplementary material for: Association of metformin, sulfonylurea and insulin use with brain structure and function and risk of dementia and Alzheimer’s disease: Pooled analysis from 5 cohorts
Source: PubMed Central journal article supplement (PMC6377188; doi:10.1371/journal.pone.0212293), 2019-02-15
Supplement: pone.0212293.s005.pdf [file pone.0212293.s005.pdf]

## S5. Assessment of Heterogeneity

**S5a Table: Heterogeneity statistics for the associations of diabetes drug classes with incident dementia and AD among individuals with diabetes**

| Outcome           | # cohorts | Metformin |            | Sulfonylurea |            | Insulin   |            |
|-------------------|-----------|-----------|------------|--------------|------------|-----------|------------|
|                   |           | I-squared | 95% CI     | I-squared    | 95% CI     | I-squared | 95% CI     |
| Incident AD       | 4         | 0.54      | 0.00, 0.85 | 0.00         | 0.00, 0.78 | 0.00      | 0.00, 0.82 |
| Incident Dementia | 5         | 0.11      | 0.00, 0.82 | 0.00         | 0.00, 0.74 | 0.00      | 0.00, 0.00 |

Adjusted for age, sex, education, physical activity, hypertension, CVD, stroke, total cholesterol, smoking, depression, BMI, HbA1C/ fasting blood glucose /random state blood glucose and ApoE4

**S5b Table: Heterogeneity statistics for the associations of diabetes drug classes with cognitive performance among individuals with diabetes**

| Outcome                         | # cohorts | Metformin |            | Sulfonylurea |                   | Insulin   |            |
|---------------------------------|-----------|-----------|------------|--------------|-------------------|-----------|------------|
|                                 |           | I-squared | 95% CI     | I-squared    | 95% CI            | I-squared | 95% CI     |
| Executive function (trails B-A) | 3         | 0.60      | 0.00, 0.89 | 0.00         | 0.00, 0.86        | 0.43      | 0.00, 0.83 |
| Word list - delayed             | 5         | 0.00      | 0.00, 0.73 | 0.31         | 0.00, 0.73        | 0.24      | 0.00, 0.69 |
| Word list - combined            | 4         | 0.30      | 0.00, 0.75 | 0.30         | 0.00, 0.75        | 0.00      | 0.00, 0.00 |
| Paragraph recall - delayed      | 3         | 0.00      | 0.00, 0.57 | 0.65         | 0.00, 0.90        | 0.00      | 0.00, 0.48 |
| Paragraph recall - combined     | 3         | 0.00      | 0.00, 0.00 | <b>0.75</b>  | <b>0.15, 0.92</b> | 0.00      | 0.00, 0.73 |

Adjusted for age, sex, education, interval between exam cycle and cognitive assessment, Physical activity, hypertension, CVD, stroke, total cholesterol, smoking, depression, BMI, HbA1C/ fasting blood glucose /random state blood glucose and ApoE4

**S5c Table: Heterogeneity statistics for the associations of diabetes drug classes with cognitive change among individuals with diabetes**

| Outcome                  | #cohorts | Metformin |            | Sulfonylurea |            | Insulin   |            |
|--------------------------|----------|-----------|------------|--------------|------------|-----------|------------|
|                          |          | I-squared | 95% CI     | I-squared    | 95% CI     | I-squared | 95% CI     |
| Including Dementia Cases | 5        | 0.56      | 0.00, 0.85 | 0.00         | 0.00, 0.77 | 0.00      | 0.00, 0.51 |
| Excluding Dementia Cases | 5        | 0.57      | 0.00, 0.86 | 0.20         | 0.00, 0.66 | 0.00      | 0.00, 0.51 |

Adjusted for age, sex, education, physical activity, hypertension, CVD, stroke, total cholesterol, smoking, depression, BMI, HbA1C/ fasting blood glucose /random state blood glucose and ApoE4

**S5d Table: Heterogeneity statistics for the associations of diabetes drug classes with brain MRI measures among individuals with diabetes**

| Outcome | #cohorts | Metformin |            | Sulfonylurea |            | Insulin   |            |
|---------|----------|-----------|------------|--------------|------------|-----------|------------|
|         |          | I-squared | 95% CI     | I-squared    | 95% CI     | I-squared | 95% CI     |
| TCBV    | 5        | 0.00      | 0.00, 0.66 | 0.22         | 0.00, 0.67 | 0.72      | 0.30, 0.89 |
| HPV     | 5        | 0.00      | 0.00, 0.65 | 0.00         | 0.00, 0.59 | 0.00      | 0.00, 0.66 |
| WMHV    | 6        | 0.00      | 0.00, 0.62 | 0.00         | 0.00, 0.57 | 0.01      | 0.00, 0.75 |

TCBV=Total cerebral brain volume; HPV=Hippocampal volume; WMHV=White matter hyperintensity volume

Adjusted for age and sex, interval between exam cycle and date of MRI, physical activity, hypertension, CVD, stroke, total cholesterol, smoking, depression, BMI, HbA1C/FBG/random blood glucose and ApoE4
