# Supplementary material for: Association of metformin, sulfonylurea and insulin use with brain structure and function and risk of dementia and Alzheimer’s disease: Pooled analysis from 5 cohorts
Source: PubMed Central journal article supplement (PMC6377188; doi:10.1371/journal.pone.0212293), 2019-02-15
Supplement: pone.0212293.s006.pdf [file pone.0212293.s006.pdf]

**S6. Analysis among a subsample of participants with diabetes who take diabetes medications (excluding those who are on life-style change only)**

**S6a Table: Associations of diabetes drug classes with risk of dementia/AD among individuals with diabetes who receive diabetes medications**

|         |                   |           | Metformin         |         | Sulfonylurea      |              | Insulin           |              |
|---------|-------------------|-----------|-------------------|---------|-------------------|--------------|-------------------|--------------|
|         | Outcome           | # cohorts | HR (95% CI)       | p-value | HR (95% CI)       | p-value      | HR (95% CI)       | p-value      |
| Model 1 | Incident AD       | 4         | 1.4 (0.8, 2.46)   | 0.235   | 0.91 (0.52, 1.57) | 0.726        | 1.52 (0.81, 2.84) | 0.195        |
|         | Incident Dementia | 5         | 1.15 (0.84, 1.59) | 0.381   | 0.73 (0.55, 0.96) | <b>0.025</b> | 1.41 (1.05, 1.9)  | <b>0.021</b> |
| Model 2 | Incident AD       | 4         | 1.87 (0.96, 3.66) | 0.067   | 0.89 (0.44, 1.78) | 0.735        | 1.43 (0.6, 3.43)  | 0.421        |
|         | Incident Dementia | 5         | 1.27 (0.89, 1.79) | 0.186   | 0.69 (0.52, 0.93) | <b>0.015</b> | 1.50 (1.09, 2.06) | <b>0.014</b> |
| Model 3 | Incident AD       | 4         | 1.75 (0.87, 3.55) | 0.119   | 0.88 (0.44, 1.78) | 0.722        | 1.39 (0.54, 3.53) | 0.494        |
|         | Incident Dementia | 5         | 1.28 (0.89, 1.84) | 0.187   | 0.67 (0.5, 0.91)  | <b>0.010</b> | 1.55 (1.12, 2.15) | <b>0.009</b> |
| Model 4 | Incident AD       | 4         | 1.48 (0.59, 3.72) | 0.405   | 0.46 (0.16, 1.31) | 0.148        | 1.07 (0.36, 3.15) | 0.907        |
|         | Incident Dementia | 5         | 1.31 (0.88, 1.94) | 0.182   | 0.64 (0.46, 0.88) | <b>0.007</b> | 1.49 (1.07, 2.07) | <b>0.018</b> |

Model 1 is adjusted for age, sex and education

Model 2 is additionally adjusted for Physical activity, hypertension, CVD, stroke, total cholesterol, smoking, depression and BMI

Model 3 is additionally adjusted for HbA1C/ fasting blood glucose /random state blood glucose, ApoE4

Model 4 is additionally adjusted for eGFR

**S6b Table: Associations of diabetes drug classes with cognitive performance among individuals with diabetes who receive diabetes medications**

|         | Outcome                                   | # cohorts | Metformin |       |              | Sulfonylurea |       |         | Insulin  |       |                  |
|---------|-------------------------------------------|-----------|-----------|-------|--------------|--------------|-------|---------|----------|-------|------------------|
|         |                                           |           | Estimate  | SE    | p-value      | Estimate     | SE    | p-value | Estimate | SE    | p-value          |
| Model 1 | Global cognition                          | 6         | 0.081     | 0.034 | <b>0.016</b> | -0.037       | 0.034 | 0.283   | -0.146   | 0.039 | <b>&lt;0.001</b> |
|         | Executive function (trails B-A)           | 3         | 0.067     | 0.050 | 0.179        | -0.017       | 0.049 | 0.736   | -0.036   | 0.058 | 0.535            |
|         | Executive function (digit span backwards) | 2         | -0.091    | 0.076 | 0.231        | -0.108       | 0.073 | 0.142   | -0.036   | 0.103 | 0.725            |
|         | Word list - delayed                       | 5         | 0.027     | 0.037 | 0.462        | -0.011       | 0.037 | 0.764   | -0.070   | 0.043 | 0.107            |
|         | Word list - combined                      | 4         | -0.056    | 0.051 | 0.274        | -0.018       | 0.010 | 0.071   | 0.024    | 0.063 | 0.700            |
|         | Paragraph recall - delayed                | 3         | 0.119     | 0.045 | <b>0.008</b> | 0.014        | 0.044 | 0.740   | -0.065   | 0.051 | 0.202            |
|         | Paragraph recall - combined               | 3         | 0.111     | 0.045 | <b>0.013</b> | 0.017        | 0.044 | 0.696   | -0.077   | 0.051 | 0.129            |
| Model 2 | Global cognition                          | 6         | 0.026     | 0.034 | 0.453        | -0.053       | 0.034 | 0.126   | -0.071   | 0.040 | 0.076            |
|         | Executive function (trails B-A)           | 3         | 0.050     | 0.052 | 0.329        | -0.014       | 0.051 | 0.787   | -0.017   | 0.061 | 0.777            |
|         | Executive function (digit span backwards) | 2         | -0.117    | 0.077 | 0.131        | -0.094       | 0.075 | 0.208   | 0.008    | 0.109 | 0.940            |
|         | Word list - delayed                       | 5         | -0.010    | 0.039 | 0.796        | -0.018       | 0.038 | 0.643   | -0.037   | 0.045 | 0.414            |
|         | Word list - combined                      | 4         | -0.074    | 0.051 | 0.146        | 0.002        | 0.010 | 0.855   | 0.077    | 0.062 | 0.217            |
|         | Paragraph recall - delayed                | 3         | 0.085     | 0.048 | 0.077        | -0.018       | 0.046 | 0.692   | -0.010   | 0.055 | 0.856            |
|         | Paragraph recall - combined               | 3         | 0.070     | 0.048 | 0.142        | -0.015       | 0.046 | 0.749   | -0.017   | 0.055 | 0.751            |
| Model 3 | Global cognition                          | 6         | 0.015     | 0.035 | 0.666        | -0.040       | 0.035 | 0.246   | -0.026   | 0.042 | 0.531            |
|         | Executive function (trails B-A)           | 3         | 0.051     | 0.052 | 0.330        | -0.001       | 0.052 | 0.978   | 0.032    | 0.066 | 0.632            |
|         | Executive function (digit span backwards) | 2         | -0.143    | 0.078 | 0.065        | -0.080       | 0.075 | 0.285   | 0.045    | 0.109 | 0.678            |
|         | Word list - delayed                       | 5         | -0.029    | 0.039 | 0.463        | -0.016       | 0.039 | 0.683   | 0.000    | 0.048 | 0.995            |
|         | Word list - combined                      | 4         | -0.084    | 0.052 | 0.106        | -0.023       | 0.053 | 0.666   | 0.088    | 0.064 | 0.170            |
|         | Paragraph recall - delayed                | 3         | 0.067     | 0.048 | 0.165        | -0.022       | 0.048 | 0.645   | 0.017    | 0.060 | 0.780            |
|         | Paragraph recall - combined               | 3         | 0.047     | 0.048 | 0.331        | -0.017       | 0.048 | 0.724   | 0.011    | 0.059 | 0.856            |

Model 1: Age, sex, education and interval between exam cycle and the cognitive assessment

Model 2: Model 1 + Physical activity, hypertension, CVD, stroke, total cholesterol, smoking, depression, BMI

Model 3: Model 2+HbA1C/ fasting blood glucose /random state blood glucose and ApoE4

**S6c Table: Associations of diabetes drug classes with change in global cognition among individuals with diabetes who receive diabetes medications**

|                          | Model | # cohorts | Metformin |       |         | Sulfonylurea |       |         | Insulin  |       |         |
|--------------------------|-------|-----------|-----------|-------|---------|--------------|-------|---------|----------|-------|---------|
|                          |       |           | Estimate  | SE    | p-value | Estimate     | SE    | p-value | Estimate | SE    | p-value |
| Including Dementia Cases | 1     | 5         | -0.00008  | 0.008 | 0.993   | -0.012       | 0.006 | 0.073   | -0.006   | 0.007 | 0.402   |
|                          | 2     | 5         | -0.001    | 0.009 | 0.905   | -0.010       | 0.007 | 0.122   | -0.007   | 0.008 | 0.339   |
|                          | 3     | 5         | -0.001    | 0.009 | 0.868   | -0.010       | 0.007 | 0.121   | -0.008   | 0.008 | 0.312   |
| Excluding Dementia Cases | 1     | 5         | -0.002    | 0.008 | 0.780   | -0.008       | 0.006 | 0.236   | -0.012   | 0.008 | 0.104   |
|                          | 2     | 5         | -0.004    | 0.009 | 0.668   | -0.007       | 0.007 | 0.294   | -0.013   | 0.008 | 0.103   |
|                          | 3     | 5         | -0.004    | 0.009 | 0.681   | -0.008       | 0.007 | 0.250   | -0.013   | 0.008 | 0.110   |

Model 1: age, sex and education

Model 2: further adjustment for physical activity, hypertension, CVD, stroke, total cholesterol, smoking, depression, and BMI

Model 3: Further adjustment for HbA1C/ fasting blood glucose /random state blood glucose and ApoE4

**S6d Table: Associations of diabetes drug classes with brain MRI measures among individuals with diabetes who receive diabetes medications**

|                              | Outcome | # cohorts | Metformin |          |         | Sulfonylurea |          |         | Insulin      |          |         |              |
|------------------------------|---------|-----------|-----------|----------|---------|--------------|----------|---------|--------------|----------|---------|--------------|
|                              |         |           | Estimate  | SE       | p-value | Estimate     | SE       | p-value | Estimate     | SE       | p-value |              |
| Including prevalent dementia | Model 1 | TCBV      | 5         | 0.004    | 0.003   | 0.257        | -0.008   | 0.003   | <b>0.010</b> | -0.012   | 0.005   | <b>0.009</b> |
|                              |         | HPV       | 5         | 0.00002  | 0.00001 | 0.0717       | 0.000002 | 0.00001 | 0.842        | -0.00002 | 0.00001 | 0.057        |
|                              |         | WMHV      | 6         | -0.066   | 0.0535  | 0.215        | -0.006   | 0.053   | 0.907        | 0.093    | 0.065   | 0.152        |
|                              | Model 2 | TCBV      | 5         | 0.003    | 0.003   | 0.406        | -0.008   | 0.004   | <b>0.023</b> | -0.010   | 0.005   | <b>0.024</b> |
|                              |         | HPV       | 5         | 0.000012 | 0.00001 | 0.057        | 0.000001 | 0.00001 | 0.921        | -0.00002 | 0.00001 | 0.072        |
|                              |         | WMHV      | 6         | -0.029   | 0.0519  | 0.571        | -0.006   | 0.052   | 0.911        | 0.039    | 0.061   | 0.517        |
|                              | Model 3 | TCBV      | 5         | 0.001    | 0.004   | 0.775        | -0.006   | 0.004   | 0.087        | -0.011   | 0.005   | <b>0.015</b> |
|                              |         | HPV       | 5         | 0.00002  | 0.00001 | 0.134        | 0.000004 | 0.00001 | 0.689        | -0.00001 | 0.00002 | 0.482        |
|                              |         | WMHV      | 6         | -0.0169  | 0.0523  | 0.747        | -0.011   | 0.052   | 0.832        | 0.053    | 0.062   | 0.401        |
| excluding prevalent dementia | Model 1 | TCBV      | 4         | 0.0004   | 0.005   | 0.941        | -0.010   | 0.004   | <b>0.012</b> | -0.006   | 0.007   | 0.430        |
|                              |         | HPV       | 4         | 0.004    | 0.006   | 0.516        | -0.0005  | 0.006   | 0.931        | -0.009   | 0.007   | 0.204        |
|                              |         | WMHV      | 5         | -0.077   | 0.056   | 0.170        | -0.0008  | 0.056   | 0.989        | 0.104    | 0.067   | 0.122        |
|                              | Model 2 | TCBV      | 4         | -0.0002  | 0.005   | 0.961        | -0.0081  | 0.005   | 0.106        | -0.005   | 0.007   | 0.517        |
|                              |         | HPV       | 4         | 0.001    | 0.007   | 0.874        | -0.002   | 0.006   | 0.734        | -0.011   | 0.008   | 0.144        |
|                              |         | WMHV      | 5         | -0.043   | 0.054   | 0.420        | 0.006    | 0.053   | 0.911        | 0.058    | 0.062   | 0.351        |
|                              | Model 3 | TCBV      | 4         | 0.001    | 0.005   | 0.839        | -0.0081  | 0.005   | 0.106        | -0.002   | 0.007   | 0.732        |
|                              |         | HPV       | 4         | -0.0004  | 0.007   | 0.958        | -0.001   | 0.007   | 0.861        | -0.012   | 0.009   | 0.176        |
|                              |         | WMHV      | 5         | -0.035   | 0.054   | 0.516        | 0.005    | 0.054   | 0.920        | 0.078    | 0.0642  | 0.226        |

TCBV=Total cerebral brain volume; HPV=Hippocampal volume; WMHV=White matter hyperintensity volume

Model 1 is adjusted for age and sex and interval between exam cycle and date of MRI

Model 2 is additionally adjusted for Physical activity, hypertension, CVD, stroke, total cholesterol, smoking, depression, and BMI

Model 3 is additionally adjusted for HbA1C/FBG/random BG, ApoE4
