# Supplementary material for: Association of metformin, sulfonylurea and insulin use with brain structure and function and risk of dementia and Alzheimer’s disease: Pooled analysis from 5 cohorts
Source: PubMed Central journal article supplement (PMC6377188; doi:10.1371/journal.pone.0212293), 2019-02-15
Supplement: pone.0212293.s007.pdf [file pone.0212293.s007.pdf]

## S7. Random effect meta-analyses

S7a Table: Associations of diabetes drug classes with incident dementia/AD among individuals with diabetes

|         | Outcome           | # cohorts | Metformin         |         | Sulfonylurea      |         | Insulin           |                  |
|---------|-------------------|-----------|-------------------|---------|-------------------|---------|-------------------|------------------|
|         |                   |           | HR (95% CI)       | p-value | HR (95% CI)       | p-value | HR (95% CI)       | p-value          |
| Model 1 | Incident AD       | 4         | 1.22 (0.60, 2.49) | 0.584   | 0.91 (0.59, 1.41) | 0.677   | 1.61 (0.90, 2.89) | 0.112            |
|         | Incident Dementia | 5         | 1.26 (0.87, 1.83) | 0.230   | 0.97 (0.78, 1.22) | 0.800   | 1.61 (1.23, 2.11) | <b>&lt;0.001</b> |
| Model 2 | Incident AD       | 4         | 1.47 (0.70, 3.09) | 0.307   | 0.98 (0.60, 1.6)  | 0.927   | 1.42 (0.67, 3.00) | 0.358            |
|         | Incident Dementia | 5         | 1.38 (0.96, 1.99) | 0.086   | 0.97 (0.77, 1.23) | 0.828   | 1.56 (1.17, 2.08) | <b>0.002</b>     |
| Model 3 | Incident AD       | 4         | 1.30 (0.51, 3.33) | 0.579   | 1.04 (0.62, 1.74) | 0.871   | 1.28 (0.56, 2.93) | 0.556            |
|         | Incident Dementia | 5         | 1.38 (0.97, 1.98) | 0.076   | 0.98 (0.77, 1.24) | 0.853   | 1.58 (1.18, 2.12) | <b>0.002</b>     |
| Model 4 | Incident AD       | 4         | 1.33 (0.55, 3.24) | 0.528   | 0.90 (0.52, 1.57) | 0.712   | 1.24 (0.53, 2.88) | 0.616            |
|         | Incident Dementia | 5         | 1.42 (1.02, 1.98) | 0.038   | 0.98 (0.77, 1.26) | 0.894   | 1.54 (1.14, 2.07) | <b>0.005</b>     |

Model 1 is adjusted for age, sex and education

Model 2 is additionally adjusted for Physical activity, hypertension, CVD, stroke, total cholesterol, smoking, depression and BMI

Model 3 is additionally adjusted for HbA1C, ApoE4

Model 4 is additionally adjusted for eGFR

**S7b Table: Associations of diabetes drug classes with incident dementia/AD among diabetic participants who are on medications (excluding those who are only on life-style change)**

|         | Outcome           | # cohorts | Metformin         |         | Sulfonylurea      |              | Insulin           |              |
|---------|-------------------|-----------|-------------------|---------|-------------------|--------------|-------------------|--------------|
|         |                   |           | HR (95% CI)       | P-value | HR (95% CI)       | P-value      | HR (95% CI)       | P-value      |
| Model 1 | Incident AD       | 4         | 1.17 (0.45, 3.03) | 0.742   | 0.91 (0.52, 1.57) | 0.726        | 1.52 (0.81, 2.84) | 0.195        |
|         | Incident Dementia | 5         | 1.16 (0.68, 1.96) | 0.589   | 0.73 (0.55, 0.96) | <b>0.025</b> | 1.41 (1.05, 1.90) | <b>0.021</b> |
| Model 2 | Incident AD       | 4         | 1.42 (0.46, 4.37) | 0.537   | 0.75 (0.28, 2.03) | 0.572        | 1.46 (0.58, 3.72) | 0.424        |
|         | Incident Dementia | 5         | 1.31 (0.72, 2.38) | 0.376   | 0.69 (0.47, 1.02) | 0.062        | 1.50 (1.09, 2.06) | <b>0.014</b> |
| Model 3 | Incident AD       | 4         | 1.25 (0.37, 4.22) | 0.722   | 0.68 (0.20, 2.33) | 0.539        | 1.39 (0.54, 3.53) | 0.494        |
|         | Incident Dementia | 5         | 1.34 (0.73, 2.44) | 0.345   | 0.68 (0.44, 1.06) | 0.090        | 1.55 (1.12, 2.15) | <b>0.009</b> |
| Model 4 | Incident AD       | 4         | 0.75 (0.14, 3.98) | 0.733   | 0.31 (0.05, 1.94) | 0.210        | 1.07 (0.36, 3.15) | 0.907        |
|         | Incident Dementia | 5         | 1.36 (0.75, 2.49) | 0.311   | 0.63 (0.32, 1.24) | 0.179        | 1.49 (1.07, 2.07) | <b>0.018</b> |

Model 1 is adjusted for age, sex and education

Model 2 is additionally adjusted for Physical activity, hypertension, CVD, stroke, total cholesterol, smoking, depression and BMI

Model 3 is additionally adjusted for HbA1C, ApoE4

Model 4 is additionally adjusted for eGFR

**S7c Table: Associations of diabetes drug classes with cognitive performance among individuals with diabetes**

|         | Outcome                         | # cohorts | Metformin |       |         | Sulfonylurea |       |              | Insulin  |       |         |
|---------|---------------------------------|-----------|-----------|-------|---------|--------------|-------|--------------|----------|-------|---------|
|         |                                 |           | Estimate  | SE    | p-value | Estimate     | SE    | p-value      | Estimate | SE    | p-value |
| Model 1 | Global cognition                | 6         | -0.045    | 0.039 | 0.254   | -0.075       | 0.029 | <b>0.010</b> | -0.117   | 0.077 | 0.125   |
|         | Executive function (trails B-A) | 3         | -0.022    | 0.065 | 0.738   | -0.079       | 0.044 | 0.070        | -0.051   | 0.107 | 0.631   |
|         | Word list - delayed             | 5         | -0.013    | 0.029 | 0.663   | -0.028       | 0.037 | 0.443        | -0.041   | 0.063 | 0.514   |
|         | Word list - combined            | 4         | -0.049    | 0.044 | 0.273   | -0.019       | 0.041 | 0.644        | -0.003   | 0.059 | 0.956   |
|         | Paragraph recall - delayed      | 3         | 0.042     | 0.034 | 0.227   | -0.012       | 0.040 | 0.760        | -0.076   | 0.049 | 0.118   |
|         | Paragraph recall - combined     | 3         | 0.057     | 0.034 | 0.098   | 0.001        | 0.041 | 0.971        | -0.074   | 0.049 | 0.127   |
| Model 2 | Global cognition                | 6         | -0.052    | 0.033 | 0.118   | -0.074       | 0.034 | <b>0.032</b> | -0.066   | 0.067 | 0.326   |
|         | Executive function (trails B-A) | 3         | -0.027    | 0.059 | 0.651   | -0.072       | 0.045 | 0.113        | -0.074   | 0.068 | 0.273   |
|         | Word list - delayed             | 5         | -0.030    | 0.030 | 0.317   | -0.021       | 0.046 | 0.644        | -0.003   | 0.071 | 0.961   |
|         | Word list - combined            | 4         | -0.040    | 0.046 | 0.379   | -0.005       | 0.050 | 0.926        | 0.069    | 0.059 | 0.245   |
|         | Paragraph recall - delayed      | 3         | 0.019     | 0.036 | 0.593   | -0.076       | 0.069 | 0.272        | -0.036   | 0.053 | 0.500   |
|         | Paragraph recall - combined     | 3         | 0.034     | 0.036 | 0.340   | -0.079       | 0.083 | 0.343        | -0.029   | 0.053 | 0.580   |
| Model 3 | Global cognition                | 6         | -0.040    | 0.040 | 0.324   | -0.045       | 0.030 | 0.137        | -0.020   | 0.053 | 0.706   |
|         | Executive function (trails B-A) | 3         | 0.001     | 0.071 | 0.990   | -0.050       | 0.049 | 0.305        | 0.034    | 0.097 | 0.731   |
|         | Word list - delayed             | 5         | -0.027    | 0.031 | 0.379   | -0.015       | 0.043 | 0.735        | 0.000    | 0.056 | 0.996   |
|         | Word list - combined            | 4         | -0.050    | 0.048 | 0.292   | -0.011       | 0.051 | 0.832        | 0.075    | 0.060 | 0.215   |
|         | Paragraph recall - delayed      | 3         | 0.024     | 0.037 | 0.508   | -0.098       | 0.092 | 0.283        | 0.002    | 0.058 | 0.974   |
|         | Paragraph recall - combined     | 3         | 0.035     | 0.036 | 0.329   | -0.106       | 0.108 | 0.327        | 0.007    | 0.058 | 0.902   |

Model 1: Age, sex, education and interval between exam cycle and the cognitive assessment

Model 2: Model 1 + Physical activity, hypertension, CVD, stroke, total cholesterol, smoking, depression, BMI

Model 3: Model 2+HbA1C/ fasting blood glucose /random state blood glucose and ApoE4

**S7d Table: Associations of diabetes drug classes with cognitive performance among individuals with diabetes who are on medications (excluding those who are only on life-style change)**

|         | Outcome                         | # cohorts | Metformin |       |              | Sulfonylurea |       |         | Insulin  |       |         |
|---------|---------------------------------|-----------|-----------|-------|--------------|--------------|-------|---------|----------|-------|---------|
|         |                                 |           | Estimate  | SE    | p-value      | Estimate     | SE    | p-value | Estimate | SE    | p-value |
| Model 1 | Global cognition                | 6         | 0.021     | 0.072 | 0.770        | -0.050       | 0.045 | 0.266   | -0.086   | 0.069 | 0.212   |
|         | Executive function (trails B-A) | 3         | 0.067     | 0.050 | 0.179        | -0.017       | 0.049 | 0.736   | -0.028   | 0.065 | 0.666   |
|         | Word list - delayed             | 5         | 0.003     | 0.052 | 0.955        | -0.011       | 0.049 | 0.826   | -0.014   | 0.076 | 0.857   |
|         | Word list - combined            | 4         | -0.056    | 0.051 | 0.274        | -0.018       | 0.010 | 0.085   | 0.025    | 0.065 | 0.699   |
|         | Paragraph recall - delayed      | 3         | 0.119     | 0.045 | <b>0.008</b> | 0.014        | 0.044 | 0.742   | -0.065   | 0.051 | 0.203   |
|         | Paragraph recall - combined     | 3         | 0.111     | 0.045 | <b>0.013</b> | 0.003        | 0.057 | 0.961   | -0.077   | 0.051 | 0.129   |
| Model 2 | Global cognition                | 6         | -0.009    | 0.061 | 0.880        | -0.060       | 0.038 | 0.119   | -0.059   | 0.046 | 0.201   |
|         | Executive function (trails B-A) | 3         | 0.050     | 0.052 | 0.330        | -0.014       | 0.051 | 0.787   | -0.017   | 0.061 | 0.777   |
|         | Word list - delayed             | 5         | -0.017    | 0.044 | 0.694        | -0.020       | 0.048 | 0.679   | 0.012    | 0.075 | 0.874   |
|         | Word list - combined            | 4         | -0.074    | 0.051 | 0.147        | 0.002        | 0.010 | 0.870   | 0.077    | 0.062 | 0.217   |
|         | Paragraph recall - delayed      | 3         | 0.085     | 0.048 | 0.078        | -0.079       | 0.094 | 0.402   | -0.010   | 0.055 | 0.857   |
|         | Paragraph recall - combined     | 3         | 0.070     | 0.048 | 0.142        | -0.081       | 0.098 | 0.409   | -0.017   | 0.055 | 0.752   |
| Model 3 | Global cognition                | 6         | -0.015    | 0.055 | 0.784        | -0.040       | 0.035 | 0.246   | -0.026   | 0.042 | 0.532   |
|         | Executive function (trails B-A) | 3         | 0.051     | 0.052 | 0.330        | -0.001       | 0.052 | 0.978   | 0.032    | 0.067 | 0.632   |
|         | Word list - delayed             | 5         | -0.029    | 0.039 | 0.463        | -0.017       | 0.042 | 0.688   | 0.023    | 0.061 | 0.713   |
|         | Word list - combined            | 4         | -0.084    | 0.052 | 0.106        | -0.023       | 0.053 | 0.666   | 0.088    | 0.064 | 0.170   |
|         | Paragraph recall - delayed      | 3         | 0.067     | 0.048 | 0.165        | -0.102       | 0.107 | 0.342   | 0.017    | 0.060 | 0.780   |
|         | Paragraph recall - combined     | 3         | 0.047     | 0.048 | 0.332        | -0.111       | 0.117 | 0.344   | 0.011    | 0.059 | 0.856   |

Model 1: Age, sex, education and interval between exam cycle and the cognitive assessment

Model 2: Model 1 + Physical activity, hypertension, CVD, stroke, total cholesterol, smoking, depression, BMI

Model 3: Model 2+HbA1C/ fasting blood glucose /random state blood glucose and ApoE4

**S7e Table: Associations of diabetes drug classes with change in cognitive performance among individuals with diabetes**

|                              | Model | # cohorts | Metformin* |       |         | Sulfonylurea |       |              | Insulin   |       |         |
|------------------------------|-------|-----------|------------|-------|---------|--------------|-------|--------------|-----------|-------|---------|
|                              |       |           | Estimate   | SE    | p-value | Estimate     | SE    | p-value      | Estimate  | SE    | p-value |
| Including prevalent dementia | 1     | 5         | 0.008      | 0.012 | 0.538   | -0.010       | 0.005 | 0.058        | -0.007267 | 0.008 | 0.383   |
|                              | 2     | 5         | 0.006      | 0.013 | 0.653   | -0.011       | 0.006 | 0.055        | -0.00888  | 0.007 | 0.214   |
|                              | 3     | 5         | 0.005      | 0.013 | 0.715   | -0.011       | 0.006 | <b>0.046</b> | -0.010609 | 0.007 | 0.146   |
| Excluding prevalent dementia | 1     | 5         | 0.005      | 0.012 | 0.690   | -0.007       | 0.006 | 0.255        | -0.012377 | 0.007 | 0.083   |
|                              | 2     | 5         | 0.004      | 0.013 | 0.780   | -0.008       | 0.007 | 0.247        | -0.013139 | 0.007 | 0.073   |
|                              | 3     | 5         | 0.002      | 0.013 | 0.859   | -0.009       | 0.007 | 0.189        | -0.014457 | 0.007 | 0.054   |

Model 1: age, sex and education

Model 2: further adjustment for physical activity, hypertension, CVD, stroke, total cholesterol, smoking, depression, and BMI

Model 3: Further adjustment for HbA1C/ fasting blood glucose /random state blood glucose and ApoE4

**S7f Table: Associations of diabetes drug classes with change in cognitive performance among individuals with diabetes who are on medications (excluding those who are only on life-style change)**

|         | Outcome                  | # cohorts | Metformin |       |         | Sulfonylurea |       |         | Insulin  |       |         |
|---------|--------------------------|-----------|-----------|-------|---------|--------------|-------|---------|----------|-------|---------|
|         |                          |           | Estimate  | SE    | p-value | Estimate     | SE    | p-value | Estimate | SE    | p-value |
| Model 1 | Including Dementia Cases | 5         | 0.005     | 0.013 | 0.688   | -0.012       | 0.008 | 0.104   | -0.006   | 0.008 | 0.402   |
|         | Excluding Dementia Cases | 5         | 0.003     | 0.013 | 0.841   | -0.010       | 0.010 | 0.331   | -0.012   | 0.008 | 0.113   |
| Model 2 | Including Dementia Cases | 5         | 0.003     | 0.014 | 0.807   | -0.011       | 0.009 | 0.210   | -0.008   | 0.008 | 0.335   |
|         | Excluding Dementia Cases | 5         | -0.0002   | 0.014 | 0.990   | -0.007       | 0.011 | 0.490   | -0.013   | 0.008 | 0.108   |
| Model 3 | Including Dementia Cases | 5         | 0.002     | 0.014 | 0.891   | -0.011       | 0.008 | 0.195   | -0.008   | 0.008 | 0.308   |
|         | Excluding Dementia Cases | 5         | -0.0006   | 0.014 | 0.969   | -0.008       | 0.011 | 0.459   | -0.013   | 0.008 | 0.114   |

Model 1: age, sex and education

Model 2: further adjustment for physical activity, hypertension, CVD, stroke, total cholesterol, smoking, depression, and BMI

Model 3: Further adjustment for HbA1C/ fasting blood glucose /random state blood glucose and ApoE4

**S7g Table: Associations of diabetes drug classes (single or in combination) with MRI measures among individuals with diabetes**

|                              | Outcome | # cohorts | Metformin |         |         | Sulfonylurea |         |         | Insulin  |         |         |       |
|------------------------------|---------|-----------|-----------|---------|---------|--------------|---------|---------|----------|---------|---------|-------|
|                              |         |           | Estimate  | SE      | p-value | Estimate     | SE      | p-value | Estimate | SE      | p-value |       |
| including prevalent dementia | Model 1 | TCBV      | 5         | -0.003  | 0.004   | 0.490        | -0.010  | 0.008   | 0.193    | -0.0176 | 0.020   | 0.370 |
|                              |         | HPV       | 5         | -0.0006 | 0.003   | 0.827        | -0.001  | 0.003   | 0.624    | -0.002  | 0.003   | 0.565 |
|                              |         | WMHV      | 6         | 0.062   | 0.038   | 0.105        | 0.077   | 0.044   | 0.083    | 0.149   | 0.077   | 0.053 |
|                              | Model 2 | TCBV      | 5         | -0.002  | 0.003   | 0.546        | -0.008  | 0.007   | 0.286    | -0.017  | 0.021   | 0.411 |
|                              |         | HPV       | 5         | -0.001  | 0.003   | 0.621        | -0.001  | 0.003   | 0.670    | -0.002  | 0.003   | 0.482 |
|                              |         | WMHV      | 6         | 0.037   | 0.038   | 0.339        | 0.046   | 0.045   | 0.301    | 0.072   | 0.088   | 0.416 |
|                              | Model 3 | TCBV      | 5         | -0.001  | 0.003   | 0.737        | -0.006  | 0.005   | 0.169    | -0.010  | 0.014   | 0.487 |
|                              |         | HPV       | 5         | -0.0009 | 0.003   | 0.735        | -0.0007 | 0.003   | 0.806    | -0.001  | 0.003   | 0.701 |
|                              |         | WMHV      | 6         | 0.030   | 0.034   | 0.445        | 0.034   | 0.045   | 0.448    | 0.040   | 0.061   | 0.510 |
| excluding prevalent dementia | Model 1 | TCBV      | 4         | -0.028  | 0.059   | 0.633        | -0.364  | 0.251   | 0.148    | -0.789  | 0.514   | 0.125 |
|                              |         | HPV       | 4         | -0.002  | 0.005   | 0.714        | -0.006  | 0.006   | 0.282    | -0.011  | 0.007   | 0.114 |
|                              |         | WMHV      | 5         | 0.047   | 0.040   | 0.241        | 0.078   | 0.046   | 0.089    | 0.157   | 0.088   | 0.074 |
|                              | Model 2 | TCBV      | 4         | 0.004   | 0.004   | 0.371        | -0.303  | 0.262   | 0.248    | -0.885  | 0.546   | 0.105 |
|                              |         | HPV       | 4         | -0.004  | 0.005   | 0.435        | -0.005  | 0.006   | 0.435    | -0.013  | 0.007   | 0.093 |
|                              |         | WMHV      | 5         | 0.019   | 0.040   | 0.640        | 0.049   | 0.046   | 0.287    | 0.082   | 0.094   | 0.383 |
|                              | Model 3 | TCBV      | 4         | -0.002  | 0.004   | 0.640        | -0.138  | 0.158   | 0.383    | -0.737  | 0.437   | 0.092 |
|                              |         | HPV       | 4         | -0.002  | 0.005   | 0.686        | -0.003  | 0.006   | 0.670    | -0.011  | 0.008   | 0.183 |
|                              |         | WMHV      | 5         | 0.012   | 0.041   | 0.775        | 0.041   | 0.046   | 0.374    | 0.070   | 0.080   | 0.389 |

TCBV=Total cerebral brain volume; HPV=Hippocampal volume; WMHV=White matter hyperintensity volume

Model 1 is adjusted for age and sex and interval between exam cycle and date of MRI

Model 2 is additionally adjusted for Physical activity, hypertension, CVD, stroke, total cholesterol, smoking, depression, and BMI

Model 3 is additionally adjusted for HbA1C/FBG/random BG, ApoE4

**S7h Table: Associations of diabetes drug classes (single or in combination) with MRI measures among individuals on diabetes medications**

|                              |         | Outcome | # cohorts | Metformin |       |         | Sulfonylurea |       |              | Insulin  |        |         |
|------------------------------|---------|---------|-----------|-----------|-------|---------|--------------|-------|--------------|----------|--------|---------|
|                              |         |         |           | Estimate  | SE    | p-value | Estimate     | SE    | p-value      | Estimate | SE     | p-value |
| Including prevalent dementia | Model 1 | TCBV    | 5         | 0.003     | 0.005 | 0.511   | -0.008       | 0.004 | <b>0.040</b> | -0.013   | 0.014  | 0.357   |
|                              |         | HPV     | 5         | 0.0005    | 0.003 | 0.852   | -0.0001      | 0.003 | 0.964        | -0.001   | 0.003  | 0.691   |
|                              |         | WMHV    | 6         | -0.066    | 0.054 | 0.211   | -0.006       | 0.054 | 0.907        | 0.093    | 0.065  | 0.152   |
|                              | Model 2 | TCBV    | 5         | 0.003     | 0.004 | 0.525   | -0.008       | 0.004 | 0.063        | -0.012   | 0.017  | 0.473   |
|                              |         | HPV     | 5         | -0.00008  | 0.003 | 0.978   | -0.0004      | 0.003 | 0.902        | -0.001   | 0.003  | 0.634   |
|                              |         | WMHV    | 6         | -0.029    | 0.052 | 0.571   | -0.020       | 0.075 | 0.787        | 0.039    | 0.061  | 0.517   |
|                              | Model 3 | TCBV    | 5         | 0.001     | 0.004 | 0.808   | -0.006       | 0.004 | 0.147        | -0.012   | 0.013  | 0.370   |
|                              |         | HPV     | 5         | -0.0002   | 0.003 | 0.932   | -0.0001      | 0.003 | 0.972        | -0.001   | 0.003  | 0.708   |
|                              |         | WMHV    | 6         | -0.0169   | 0.052 | 0.747   | -0.030       | 0.076 | 0.693        | 0.051    | 0.069  | 0.461   |
| excluding prevalent dementia | Model 1 | TCBV    | 4         | 0.0004    | 0.006 | 0.946   | -0.010       | 0.005 | 0.047        | -0.611   | 0.423  | 0.149   |
|                              |         | HPV     | 4         | 0.004     | 0.006 | 0.535   | -0.0006      | 0.006 | 0.931        | -0.009   | 0.007  | 0.228   |
|                              |         | WMHV    | 5         | -0.077    | 0.056 | 0.170   | -0.0002      | 0.069 | 0.998        | 0.104    | 0.067  | 0.122   |
|                              | Model 2 | TCBV    | 4         | -0.0002   | 0.006 | 0.969   | -0.110       | 0.189 | 0.560        | -0.773   | 0.478  | 0.106   |
|                              |         | HPV     | 4         | 0.0008    | 0.007 | 0.910   | -0.002       | 0.007 | 0.731        | -0.011   | 0.008  | 0.161   |
|                              |         | WMHV    | 5         | -0.043    | 0.054 | 0.420   | -0.007       | 0.082 | 0.932        | 0.056    | 0.071  | 0.432   |
|                              | Model 3 | TCBV    | 4         | 0.001     | 0.006 | 0.862   | -0.008       | 0.006 | 0.170        | -0.726   | 0.4506 | 0.107   |
|                              |         | HPV     | 4         | -0.0006   | 0.007 | 0.929   | -0.001       | 0.007 | 0.859        | -0.012   | 0.009  | 0.192   |
|                              |         | WMHV    | 5         | -0.035    | 0.054 | 0.517   | -0.001       | 0.068 | 0.987        | 0.071    | 0.093  | 0.445   |

TCBV=Total cerebral brain volume; HPV=Hippocampal volume; WMHV=White matter hyperintensity volume

Model 1 is adjusted for age and sex and interval between exam cycle and date of MRI

Model 2 is additionally adjusted for Physical activity, hypertension, CVD, stroke, total cholesterol, smoking, depression, and BMI

Model 3 is additionally adjusted for HbA1C/FBG/random BG, ApoE4
